# Supplementary material
Source: Springer Nature journal article supplement (https://www.springermedizin.de/resource/supplementary/13256_2008_507_MOESM1_ESM.pdf/9646144)

pre Cetuximab/CDDP  
(06 jun 2006)

post Cetuximab/CDDP  
(08 sep 2006)

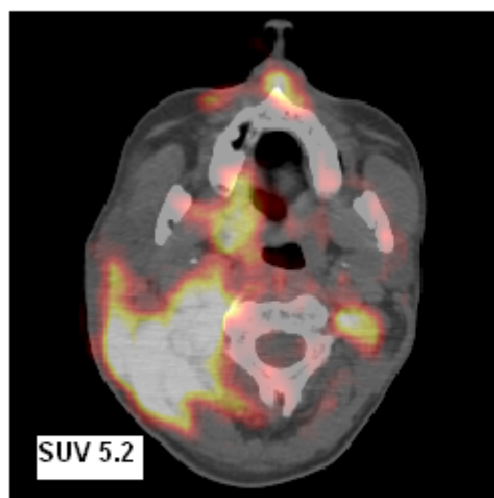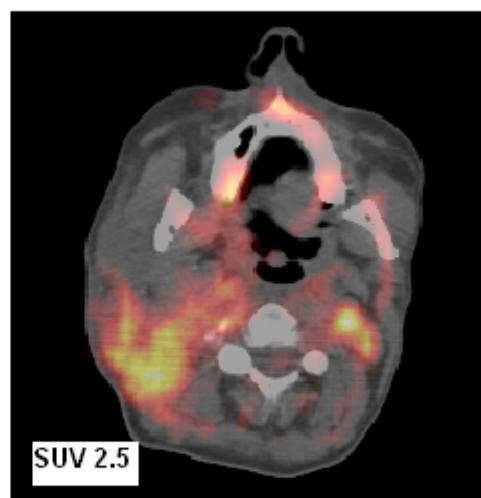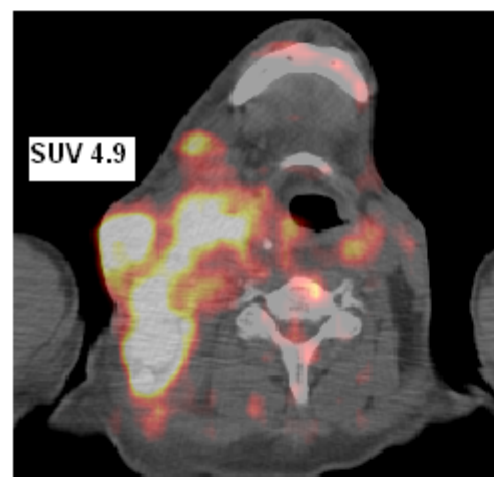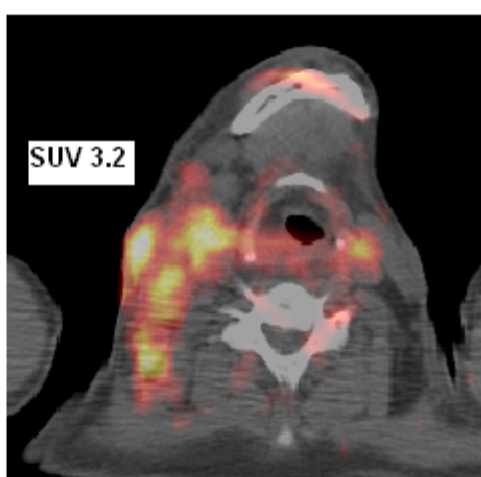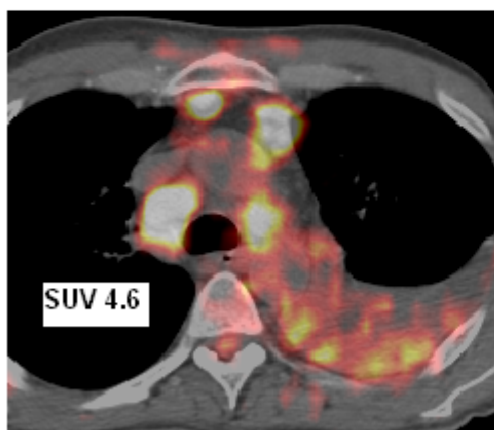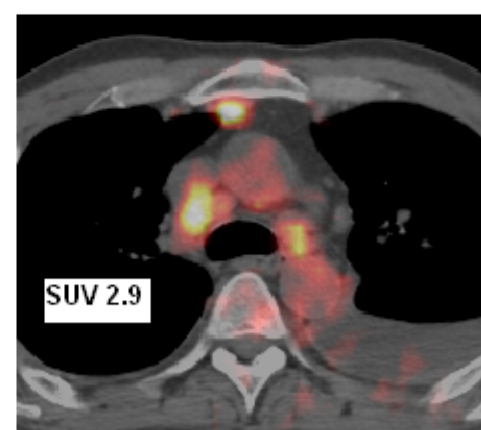

Supplement: MOESM1 [file 9646144]
